# Supplementary material for: Effectiveness of Household Disinfection Techniques to Remove SARS-Cov-2 from Cloth Masks
Source: Preprints.org preprint supplement (doi:10.20944/preprints202207.0349.v1), 2022-07-25
Supplement: Supplementary file 1 [file Mares-Guia_et_al__2022_supplementary_material.docx]

Effectiveness of household disinfection techniques to remove SARS-CoV-2 from cloth masks

Supplementary Materials

Supplementary table 1

| **B.1.1.28** | | | | | | | | | | | | | | | | | | |
| --- | --- | --- | --- | --- | --- | --- | --- | --- | --- | --- | --- | --- | --- | --- | --- | --- | --- | --- |
| **Chemical Agents** | **viral suspension (Log 10)** | **Soak Time** | | | | | | | | | | | | | | | | |
| **10 min** | | | | | | | |  | **30 min** | | | | | | | |
| **1st Rinsea** | |  | **2nd Rinsea** | |  | **3rd Rinsea** | |  | **1st Rinsea** | |  | **2nd Rinsea** | |  | **3rd Rinsea** | |
| **Ct value mean** | **Viral Load meanb** |  | **Ct value mean** | **Viral Load meanb** |  | **Ct value mean** | **Viral Load meanb** |  | **Ct value mean** | **Viral Load meanb** |  | **Ct value mean** | **Viral Load meanb** |  | **Ct value mean** | **Viral Load meanb** |
| **Soap Powder** | **Log1** | 24,1 | 2,72 x 105 |  | 26,45 | 3,65 x 104 |  | 28,51 | 5,88 x103 |  | 23,8 | 3,52 x 105 |  | 25,61 | 7 x 104 |  | 27,09 | 2.03 x 104 |
| **Log2** | 28 | 8,58 x 103 |  | 29,74 | 1,88 x 103 |  | 31,52 | 3,94 x 102 |  | 29,06 | 3,4 x103 |  | 31,18 | 5,37 x 102 |  | 32,95 | 1,13 x 102 |
| **Log3** | 32,03 | 2,58 x 102 |  | 34,14 | 3,96 x 101 |  | 35,42 | 1,30 x 101 |  | 31,79 | 3,3 x 102 |  | 34,57 | 2,71 x 101 |  | 35,65 | 1,09 x 101 |
| **Log4** | 33,81 | 5,68 x 101 |  | 35,93 | 1,04 x 101 |  | 38,28 | 1,05 |  | 33,11 | 9,76 x 101 |  | 34,87 | 2,39 x 101 |  | 38,07 | 1,35 |
| **Log5** | 35,04 | 1,94 x 101 |  | 36,57 | 5,55 |  | 40 | 0 |  | 36,31 | 5,92 |  | 37,69 | 1,87 |  | 40 | 0 |
| **Log6** | 40 | 0 |  | 40 | 0 |  | 40 | 0 |  | 40 | 0 |  | 40 | 0 |  | 40 | 0 |
| **Log7** | 40 | 0 |  | 40 | 0 |  | 40 | 0 |  | 40 | 0 |  | 40 | 0 |  | 40 | 0 |
| **Log8** | 37,26 | 2,61 |  | 40 | 0 |  | 40 | 0 |  | 36,43 | 5,32 |  | 40 | 0 |  | 40 | 0 |
|  |  |  |  |  |  |  |  |  |  |  |  |  |  |  |  |  |  |  |
| **Soap Powder**  **+**  **Lysoform** | **Log1** | 26,94 | 5,04 x 104 |  | 29,89 | 1,64 x 103 |  | 31,46 | 5,38 x 102 |  | 23,25 | 5,51 x 105 |  | 26 | 5,74 x 104 |  | 27,72 | 1,24 x 104 |
| **Log2** | 28 | 8.66 x 103 |  | 30,59 | 8,92 x 102 |  | 32,06 | 2,44 x 102 |  | 28,91 | 3,82 x 103 |  | 31,76 | 3,34 x 102 |  | 33,67 | 6,9 x 101 |
| **Log3** | 31,8 | 3,08 x 102 |  | 34,31 | 3,41 x 101 |  | 37 | 3,23 |  | 31,38 | 4,98 x 102 |  | 34,51 | 3,34 x 101 |  | 35,42 | 1,35 x 101 |
| **Log4** | 32,88 | 1,44 x 102 |  | 36,62 | 6,47 x 101 |  | 37,15 | 3,2 |  | 33,05 | 1,02 x 102 |  | 34,48 | 2,95 x 101 |  | 36,39 | 5,51 |
| **Log5** | 40 | 0 |  | 40 | 0 |  | 40 | 0 |  | 35,64 | 1,06 x 101 |  | 40 | 0 |  | 40 | 0 |
| **Log6** | 40 | 0 |  | 40 | 0 |  | 40 | 0 |  | 37,48 | 2,12 |  | 40 | 0 |  | 40 | 0 |
| **Log7** | 40 | 0 |  | 40 | 0 |  | 40 | 0 |  | 40 | 0 |  | 40 | 0 |  | 37,74 | 1,69 |
| **Log8** | 40 | 0 |  | 40 | 0 |  | 40 | 0 |  | 36,54 | 5,62 |  | 40 | 0 |  | 40 | 0 |
|  |  |  |  |  |  |  |  |  |  |  |  |  |  |  |  |  |  |  |
| **Soap Powder**  **+**  **Sodium Hypochlorite** | **Log1** | 40 | 0 |  | 40 | 0 |  | 40 | 0 |  | 40 | 0 |  | 40 | 0 |  | 37,41 | 2,25 |
| **Log2** | 40 | 0 |  | 40 | 0 |  | 40 | 0 |  | 40 | 0 |  | 38,76 | 6,90 x 10-1 |  | 40 | 0 |
| **Log3** | 40 | 0 |  | 40 | 0 |  | 40 | 0 |  | 40 | 0 |  | 40 | 0 |  | 40 | 0 |
| **Log4** | 40 | 0 |  | 40 | 0 |  | 40 | 0 |  | 40 | 0 |  | 38,99 | 5,64 x 10-1 |  | 40 | 0 |
| **Log5** | 40 | 0 |  | 40 | 0 |  | 40 | 0 |  | 40 | 0 |  | 37,46 | 2,16 |  | 38,07 | 1,26 |
| **Log6** | 40 | 0 |  | 40 | 0 |  | 40 | 0 |  | 40 | 0 |  | 40 | 0 |  | 40 | 0 |
| **Log7** | 40 | 0 |  | 40 | 0 |  | 40 | 0 |  | 40 | 0 |  | 40 | 0 |  | 40 | 0 |
| **Log8** | 40 | 0 |  | 40 | 0 |  | 40 | 0 |  | 40 | 0 |  | 40 | 0 |  | 40 | 0 |
|  |  |  |  |  |  |  |  |  |  |  |  |  |  |  |  |  |  |  |
| **Sodium Hypochlorite** | **Log1** | 40 | 0 |  | 40 | 0 |  | 40 | 0 |  | 40 | 0 |  | 40 | 0 |  | 39,63 | 3,22 x 10-1 |
| **Log2** | 40 | 0 |  | 40 | 0 |  | 40 | 0 |  | 40 | 0 |  | 40 | 0 |  | 40 | 0 |
| **Log3** | 40 | 0 |  | 40 | 0 |  | 40 | 0 |  | 40 | 0 |  | 40 | 0 |  | 40 | 0 |
| **Log4** | 40 | 0 |  | 40 | 0 |  | 40 | 0 |  | 40 | 0 |  | 40 | 0 |  | 40 | 0 |
| **Log5** | 40 | 0 |  | 40 | 0 |  | 40 | 0 |  | 40 | 0 |  | 40 | 0 |  | 40 | 0 |
| **Log6** | 40 | 0 |  | 40 | 0 |  | 40 | 0 |  | 40 | 0 |  | 40 | 0 |  | 40 | 0 |
| **Log7** | 40 | 0 |  | 40 | 0 |  | 40 | 0 |  | 40 | 0 |  | 40 | 0 |  | 40 | 0 |
| **Log8** | 40 | 0 |  | 40 | 0 |  | 40 | 0 |  | 40 | 0 |  | 40 | 0 |  | 40 | 0 |
|  |  |  |  |  |  |  |  |  |  |  |  |  |  |  |  |  |  |  |
| **70% alcoholc** | **Log1** | 27,92 | 9,19 x 103 |  | 30,1 | 1,36 x 103 |  | 31,85 | 2,93 x 102 |  | 26,94 | 2,61 x 104 |  | 28,98 | 3,97 x 103 |  | 32,11 | 2,58 x 102 |
| **Log2** | 28,9 | 3,92 x 103 |  | 32,29 | 2,02 x 102 |  | 34,3 | 3,56 x 101 |  | 29,24 | 2,92 x 103 |  | 31,45 | 4,21 x 102 |  | 34,64 | 2,9 x 101 |
| **Log3** | 35,99 | 7,93 |  | 37,12 | 2,98 |  | 36,39 | 5,5 |  | 31,99 | 2,71 x 102 |  | 34,75 | 2,31 x 101 |  | 40 | 0 |
| **Log4** | 40 | 0 |  | 40 | 0 |  | 40 | 0 |  | 35,21 | 3,16 x 101 |  | 36,19 | 6,73 |  | 37,52 | 2,04 |
| **Log5** | 36,9 | 3,87 |  | 37,65 | 1,82 |  | 40 | 0 |  | 36,18 | 6,93 |  | 40 | 0 |  | 40 | 0 |
| **Log6** | 37,55 | 1,99 |  | 40 | 0 |  | 40 | 0 |  | 40 | 0 |  | 40 | 0 |  | 40 | 0 |
| **Log7** | 40 | 0 |  | 40 | 0 |  | 40 | 0 |  | 40 | 0 |  | 40 | 0 |  | 40 | 0 |
| **Log8** | 40 | 0 |  | 40 | 0 |  | 40 | 0 |  | 40 | 0 |  | 40 | 0 |  | 40 | 0 |
|  |  |  |  |  |  |  |  |  |  |  |  |  |  |  |  |  |  |  |
| **Wash Control** | **Log1** | 30,09 | 1,38 x 103 |  | 32,94 | 1,22 x 102 |  | 35,48 | 1 x 102 |  | 29,86 | 1,76 x 103 |  | 30,19 | 1,63 x 102 |  | 30,21 | 2,19 x 103 |
| **Log2** | 33,69 | 5,88 x 101 |  | 36,21 | 6,55 |  | 36,62 | 4,82 |  | 30,63 | 9,8 x 102 |  | 34,34 | 3,35 x 101 |  | 36,37 | 6,42 |
| **Log3** | 37,57 | 1,96 |  | 40 | 0 |  | 37,32 | 2,44 |  | 40 | 0 |  | 40 | 0 |  | 40 | 0 |
| **Log4** | 40 | 0 |  | 37,67 | 1,79 |  | 40 | 0 |  | 40 | 0 |  | 37,42 | 2,23 |  | 40 | 0 |
| **Log5** | 36,45 | 5,22 |  | 40 | 0 |  | 40 | 0 |  | 40 | 0 |  | 40 | 0 |  | 40 | 0 |
| **Log6** | 40 | 0 |  | 40 | 0 |  | 40 | 0 |  | 40 | 0 |  | 40 | 0 |  | 40 | 0 |
| **Log7** | 40 | 0 |  | 40 | 0 |  | 40 | 0 |  | 40 | 0 |  | 40 | 0 |  | 40 | 0 |
| **Log8** | 40 | 0 |  | 40 | 0 |  | 40 | 0 |  | 40 | 0 |  | 40 | 0 |  | 40 | 0 |
|  |  |  |  |  |  |  |  |  |  |  |  |  |  |  |  |  |  |  |
| **Virus Control** | **Log1** | 40 | 0 |  | 40 | 0 |  | 40 | 0 |  | 40 | 0 |  | 40 | 0 |  | 40 | 0 |
| **Log2** | 40 | 0 |  | 40 | 0 |  | 40 | 0 |  | 40 | 0 |  | 37,52 | 2,04 |  | 40 | 0 |
| **Log3** | 40 | 0 |  | 40 | 0 |  | 40 | 0 |  | 40 | 0 |  | 40 | 0 |  | 40 | 0 |
| **Log4** | 40 | 0 |  | 40 | 0 |  | 40 | 0 |  | 40 | 0 |  | 40 | 0 |  | 40 | 0 |
| **Log5** | 40 | 0 |  | 40 | 0 |  | 40 | 0 |  | 40 | 0 |  | 40 | 0 |  | 40 | 0 |
| **Log6** | 40 | 0 |  | 40 | 0 |  | 40 | 0 |  | 40 | 0 |  | 40 | 0 |  | 40 | 0 |
| **Log7** | 40 | 0 |  | 40 | 0 |  | 40 | 0 |  | 40 | 0 |  | 40 | 0 |  | 40 | 0 |
| **Log8** | 40 | 0 |  | 40 | 0 |  | 40 | 0 |  | 40 | 0 |  | 40 | 0 |  | 40 | 0 |
| a = All experiments were performed in duplicates, the data presented in the table are the means of Cts and viral loads from rinses; b = Viral loads are presented in the concentration of PFU/ml. | | | | | | | | | | | | | | | | | | |

Supplementary table 2

| **P1** | | | | | | | | | | | | | | | | | | |
| --- | --- | --- | --- | --- | --- | --- | --- | --- | --- | --- | --- | --- | --- | --- | --- | --- | --- | --- |
| **Chemical Agents** | **Viral Suspension (Log10)** | **Soak Time** | | | | | | | | | | | | | | | | |
| **10 min** | | | | | | | |  | **30 min** | | | | | | | |
| **1st Rinsea** | |  | **2nd Rinsea** | |  | **3rd Rinsea** | |  | **1st Rinsea** | |  | **2nd Rinsea** | |  | **3rd Rinsea** | |
| **Ct value mean** | **Viral Load meanb** |  | **Ct value mean** | **Viral Load meanb** |  | **Ct value mean** | **Viral Load meanb** |  | **Ct value mean** | **Viral Load meanb** |  | **Ct value mean** | **Viral Load meanb** |  | **Ct value mean** | **Viral Load meanb** |
| **Soap Powder** | **Log1** | 25,24 | 1,54 x 104 |  | 28 | 2,1 x 103 |  | 29 | 5,4 x 103 |  | 25,1 | 1,77 x 104 |  | 27,87 | 2.27 x 103 |  | 29,42 | 7,68 x 102 |
| **Log2** | 27,98 | 2,17 x 103 |  | 30,59 | 3,18 x 102 |  | 31,6 | 1,53 x 102 |  | 27,64 | 2,7 x 103 |  | 29,85 | 5,44 x 102 |  | 31,98 | 1,22 x 102 |
| **Log3** | 31,73 | 1,41 x 102 |  | 34,11 | 2,52 x 101 |  | 36,1 | 5,57 |  | 31,75 | 1,41 x 102 |  | 33,78 | 3,25 x 101 |  | 36,11 | 5,92 |
| **Log4** | 35,75 | 7,7 |  | 36,65 | 4,02 |  | 34,8 | 1,34 x 101 |  | 36,44 | 4,67 |  | 37,59 | 2,04 |  | 40 | 0 |
| **Log5** | 33,35 | 4,46 x 101 |  | 35,22 | 1,12 x 101 |  | 37,36 | 2,36 |  | 33,05 | 5,38 x 101 |  | 35,77 | 7,91 |  | 37,64 | 1,97 |
| **Log6** | 36,41 | 5,08 |  | 40 | 0 |  | 40 | 0 |  | 35,85 | 7,12 |  | 38,01 | 1,51 |  | 40 | 0 |
| **Log7** | 40 | 0 |  | 40 | 0 |  | 40 | 0 |  | 37,42 | 2,31 |  | 40 | 0 |  | 40 | 6,25x 10-1 |
| **Log8** | 40 | 0 |  | 40 | 0 |  | 40 | 0 |  | 39,23 | 0 |  | 40 | 0 |  | 40 | 0 |
|  |  |  |  |  |  |  |  |  |  |  |  |  |  |  |  |  |  |  |
| **Soap Powder**  **+**  **Lysoform** | **Log1** | 25,38 | 1,36 x 104 |  | 28,16 | 1,9 x 103 |  | 28,91 | 1,11 x 103 |  | 25 | 1,8 x 104 |  | 28,42 | 1,6 x 103 |  | 29,03 | 1,01 x 103 |
| **Log2** | 27,19 | 3,8 x 103 |  | 29,78 | 5,92 x 102 |  | 31,24 | 2,03 x 102 |  | 26,87 | 5,09 x 103 |  | 29,66 | 7,24 x 102 |  | 31,39 | 1,82 x 102 |
| **Log3** | 31,22 | 2,38 x 102 |  | 33,36 | 3,26 x 101 |  | 35,68 | 1,02 x 101 |  | 31,14 | 2,15 x 102 |  | 33,28 | 4,58 x 101 |  | 35,78 | 8,86 |
| **Log4** | 35,25 | 1,27 x 101 |  | 37,02 | 3,22 |  | 0 | 0 |  | 34,88 | 1,45 x 101 |  | 36,88 | 3,89 |  | 37,54 | 2,12 |
| **Log5** | 32,69 | 7,27 x 101 |  | 35,48 | 9,2 |  | 36,07 | 6,2 |  | 32,81 | 6,59 |  | 35,93 | 1,02 x 101 |  | 36,83 | 3,52 |
| **Log6** | 36,73 | 4,44 |  | 37,18 | 2,89 |  | 37,66 | 1,94 |  | 35,88 | 8,98 |  | 39,04 | 7,16 x 10-1 |  | 40 | 0 |
| **Log7** | 38,5 | 1,06 |  | 40 | 0 |  | 40 | 0 |  | 40 | 0 |  | 40 | 0 |  | 38,18 | 1,33 |
| **Log8** | 37,7 | 1,88 |  | 40 | 0 |  | 40 | 0 |  | 40 | 0 |  | 40 | 0 |  | 40 | 0 |
|  |  |  |  |  |  |  |  |  |  |  |  |  |  |  |  |  |  |  |
| **Soap Powder**  **+**  **Sodium Hypochlorite** | **Log1** | 40 | 0 |  | 40 | 0 |  | 40 | 0 |  | 40 | 0 |  | 40 | 0 |  | 40 | 0 |
| **Log2** | 39,1 | 6,86 x 10-1 |  | 40 | 0 |  | 40 | 0 |  | 40 | 0 |  | 39,41 | 5,49 x 10-1 |  | 40 | 0 |
| **Log3** | 40 | 0 |  | 40 | 0 |  | 40 | 0 |  | 40 | 0 |  | 40 | 0 |  | 40 | 0 |
| **Log4** | 40 | 0 |  | 40 | 0 |  | 40 | 0 |  | 40 | 0 |  | 40 | 0 |  | 40 | 0 |
| **Log5** | 40 | 0 |  | 40 | 0 |  | 40 | 0 |  | 40 | 0 |  | 40 | 0 |  | 40 | 0 |
| **Log6** | 40 | 0 |  | 40 | 0 |  | 40 | 0 |  | 40 | 0 |  | 40 | 0 |  | 40 | 0 |
| **Log7** | 40 | 0 |  | 40 | 0 |  | 40 | 0 |  | 40 | 0 |  | 40 | 0 |  | 40 | 0 |
| **Log8** | 40 | 0 |  | 40 | 0 |  | 38,5 | 1,06 |  | 40 | 0 |  | 40 | 0 |  | 40 | 0 |
|  |  |  |  |  |  |  |  |  |  |  |  |  |  |  |  |  |  |  |
| **Sodium Hypochlorite** | **Log1** | 40 | 0 |  | 40 | 0 |  | 40 | 0 |  | 40 | 0 |  | 40 | 0 |  | 40 | 0 |
| **Log2** | 40 | 0 |  | 40 | 0 |  | 40 | 0 |  | 40 | 0 |  | 40 | 0 |  | 40 | 0 |
| **Log3** | 40 | 0 |  | 40 | 0 |  | 40 | 0 |  | 40 | 0 |  | 40 | 0 |  | 40 | 0 |
| **Log4** | 40 | 0 |  | 40 | 0 |  | 40 | 0 |  | 40 | 0 |  | 40 | 0 |  | 40 | 0 |
| **Log5** | 40 | 0 |  | 40 | 0 |  | 40 | 0 |  | 40 | 0 |  | 40 | 0 |  | 40 | 0 |
| **Log6** | 40 | 0 |  | 40 | 0 |  | 40 | 0 |  | 40 | 0 |  | 40 | 0 |  | 40 | 0 |
| **Log7** | 40 | 0 |  | 40 | 0 |  | 40 | 0 |  | 40 | 0 |  | 40 | 0 |  | 40 | 0 |
| **Log8** | 40 | 0 |  | 40 | 0 |  | 40 | 0 |  | 40 | 0 |  | 40 | 0 |  | 40 | 0 |
|  |  |  |  |  |  |  |  |  |  |  |  |  |  |  |  |  |  |  |
| **70% alcoholc** | **Log1** | 29,5 | 7,42 x 102 |  | 30,94 | 2,5 x 102 |  | 31,76 | 1,37 x 102 |  | 28,5 | 1,46 |  | 31,9 | 1,27 x 102 |  | 34,26 | 2,25 x 101 |
| **Log2** | 30,18 | 4,28 x 102 |  | 32,92 | 5,92 x 101 |  | 32,68 | 7,22 x 101 |  | 29,65 | 6,96 x 102 |  | 33,29 | 4,75 x 101 |  | 35,26 | 1,08 x 101 |
| **Log3** | 32,82 | 6,82 101 |  | 34,35 | 2,15 x 101 |  | 35,47 | 9,43 |  | 33,08 | 5,30 x 101 |  | 33,73 | 3,57 x 101 |  | 36,89 | 3,38 |
| **Log4** | 40 | 0 |  | 37,27 | 2,57 |  | 0 | 0 |  | 38,1 | 3,45 |  | 38,8 | 8,52 x 10-1 |  | 39,29 | 5,98 x 10-1 |
| **Log5** | 34,11 | 2,56 |  | 36,32 | 5,1 |  | 36,45 | 5,97 |  | 37,26 | 3,89 |  | 38,49 | 1,07 |  | 38,87 | 8,1 |
| **Log6** | 37,74 | 1,83 |  | 37,58 | 2,05 |  | 40 | 0 |  | 37,4 | 4,18 |  | 37,47 | 2,22 |  | 38,08 | 1,56 |
| **Log7** | 40 | 0 |  | 38,3 | 1,22 |  | 40 | 0 |  | 40 | 0 |  | 40 | 0 |  | 38,12 | 1,39 |
| **Log8** | 40 | 0 |  | 39,56 | 4,92 x 10-1 |  | 40 | 0 |  | 38,62 | 1,22 |  | 39,09 | 6,91 x 10-1 |  | 38,58 | 9,99 x 10-1 |
|  |  |  |  |  |  |  |  |  |  |  |  |  |  |  |  |  |  |  |
| **Wash Control** | **Log1** | 29,53 | 9,42 x 102 |  | 29,41 | 7,62 x 102 |  | 31,32 | 1,95 x 102 |  | 28,58 | 1,35 x 103 |  | 29,18 | 1,44 x 102 |  | 29,99 | 4,9 x 102 |
| **Log2** | 30,97 | 2,42 x 102 |  | 32,64 | 2,89 x 102 |  | 32,9 | 1,4 x 102 |  | 31,4 | 1,86 x 102 |  | 30,82 | 2,37 x 102 |  | 32,18 | 1,01 x102 |
| **Log3** | 35,4 | 2,19 x 102 |  | 35,45 | 9,56 |  | 37,21 | 2,75 |  | 34,23 | 2,44 x 101 |  | 35,27 | 1,53 x 101 |  | 36,68 | 3,93 |
| **Log4** | 37,44 | 2,27 |  | 40 | 0 |  | 40 | 0 |  | 40 | 0 |  | 40 | 0 |  | 40 | 0 |
| **Log5** | 38,05 | 9,19 x 101 |  | 36,55 | 4,31 |  | 36,6 | 4,71 |  | 34,88 | 3,05 x 101 |  | 35,53 | 1,16 x 101 |  | 37 | 3,15 |
| **Log6** | 38,04 | 1,47 |  | 40 | 0 |  | 40 | 0 |  | 37,57 | 2,07 |  | 40 | 0 |  | 38,75 | 8,83x10-1 |
| **Log7** | 40 | 0 |  | 40 | 0 |  | 40 | 0 |  | 39,47 | 5,25x10-1 |  | 40 | 0 |  | 38,68 | 9,29x10-1 |
| **Log8** | 40 | 0 |  | 40 | 0 |  | 40 | 0 |  | 40 | 0 |  | 40 | 0 |  | 40 | 0 |
|  |  |  |  |  |  |  |  |  |  |  |  |  |  |  |  |  |  |  |
| **Virus Control** | **Log1** | 40 | 0 |  | 40 | 0 |  | 40 | 0 |  | 40 | 0 |  | 40 | 0 |  | 40 | 0 |
| **Log2** | 40 | 0 |  | 40 | 0 |  | 40 | 0 |  | 40 | 0 |  | 40 | 0 |  | 40 | 0 |
| **Log3** | 40 | 0 |  | 40 | 0 |  | 40 | 0 |  | 40 | 0 |  | 40 | 0 |  | 40 | 0 |
| **Log4** | 40 | 0 |  | 40 | 0 |  | 40 | 0 |  | 40 | 0 |  | 40 | 0 |  | 40 | 0 |
| **Log5** | 40 | 0 |  | 40 | 0 |  | 40 | 0 |  | 40 | 0 |  | 40 | 0 |  | 40 | 0 |
| **Log6** | 40 | 0 |  | 40 | 0 |  | 40 | 0 |  | 40 | 0 |  | 40 | 0 |  | 40 | 0 |
| **Log7** | 40 | 0 |  | 40 | 0 |  | 40 | 0 |  | 40 | 0 |  | 40 | 0 |  | 40 | 0 |
| **Log8** | 40 | 0 |  | 40 | 0 |  | 40 | 0 |  | 40 | 0 |  | 40 | 0 |  | 40 | 0 |
| a = All experiments were performed in duplicates, the data presented in the table are the means of Cts and viral loads from rinses; b = Viral loads are presented in the concentration of PFU/ml. | | | | | | | | | | | | | | | | | | |
